# Supplementary material for: Stochastic Dominance Analysis Without the Independence Axiom
Source: Atypon-hosted journal article supplement (doi:10.1287/mnsc.2015.2388), 2016-05-23
Supplement: mnsc.2015.2388-sm.pdf [file mnsc.2015.2388-sm.pdf]

# Stochastic Dominance Analysis without the Independence Axiom

## Online Appendix

Simone Cerreia-Vioglio, Fabio Maccheroni, Massimo Marinacci

Department of Decision Sciences and IGIER

Università Bocconi

October 8, 2015

Consider  $V$  defined as in (9 in the main text). We first report a simple property.

**Lemma 2**  $V : \mathcal{D} \rightarrow \mathbb{R}$  is continuous.

**Proof of Proposition 4.** We want to compute the Gateaux derivative of  $V$  at  $F$  in direction  $G - F$ , that is,

$$\lim_{\theta \downarrow 0} \frac{V((1-\theta)F + \theta G) - V(F)}{\theta} \quad \forall F, G \in \mathcal{D}. \quad (16)$$

The computation is simplified by the observation that for each function  $f : [m, M] \rightarrow \mathbb{R}$  of bounded variation, the Riemann-Stieltjes integral  $\int_m^M f(x) dv(x)$  coincides with the Lebesgue-Stieltjes integral  $\int_{[m, M]} f dv$  of  $f$  with respect to the Borel measure induced on  $[m, M]$  by any continuous and increasing extension of  $v$  to  $\mathbb{R}$ . Set  $H = G - F$ , and note that, provided the limit in (16) exists, it is equal to

$$\begin{aligned} &= \lim_{\theta \downarrow 0} \frac{V(F + \theta(G - F)) - V(F)}{\theta} \\ &= \lim_{\theta \downarrow 0} \frac{\int_{[0, M]} w(1 - F - \theta H) dv - \int_{[m, 0]} \tilde{w}(F + \theta H) dv - \int_{[0, M]} w(1 - F) dv + \int_{[m, 0]} \tilde{w}(F) dv}{\theta} \\ &= \lim_{\theta \downarrow 0} \int_{[0, M]} \frac{w(1 - F(x) - \theta H(x)) - w(1 - F(x))}{\theta} dv(x) - \int_{[m, 0]} \frac{\tilde{w}(F(x) + \theta H(x)) - \tilde{w}(F(x))}{\theta} dv(x). \end{aligned}$$

For each  $x \in [m, M]$ , we have that

- if  $x \in [0, M]$  and  $H(x) \neq 0$ , then

$$\begin{aligned} \lim_{\theta \downarrow 0} \frac{w(1 - F(x) - \theta H(x)) - w(1 - F(x))}{\theta} &= \lim_{\theta \downarrow 0} \frac{w(1 - F(x) - \theta H(x)) - w(1 - F(x))}{-\theta H(x)} (-H(x)) \\ &= -w'(1 - F(x)) H(x) \end{aligned}$$

and the same holds when  $H(x) = 0$ ;

- if  $x \in [m, 0]$  and  $H(x) \neq 0$ , then

$$\lim_{\theta \downarrow 0} \frac{\tilde{w}(F(x) + \theta H(x)) - \tilde{w}(F(x))}{\theta} = \lim_{\theta \downarrow 0} \frac{\tilde{w}(F(x) + \theta H(x)) - \tilde{w}(F(x))}{\theta H(x)} H(x) = \tilde{w}'(F(x)) H(x)$$

and the same holds when  $H(x) = 0$ .

Continuous differentiability on  $[0, 1]$  of  $w$  and  $\tilde{w}$  implies their Lipschitzianity so that, for each  $x \in [m, M]$  and each  $\theta \in (0, 1)$ ,

$$\left| \frac{w(1 - F(x) - \theta H(x)) - w(1 - F(x))}{\theta} \right| \leq \frac{L_w |1 - F(x) - \theta(G(x) - F(x)) - (1 - F(x))|}{\theta} \leq L_w$$

and

$$\left| \frac{\tilde{w}(F(x) + \theta H(x)) - \tilde{w}(F(x))}{\theta} \right| \leq \frac{L_{\tilde{w}} |F(x) + \theta(G(x) - F(x)) - F(x)|}{\theta} \leq L_{\tilde{w}}.$$

Therefore the Dominated Convergence Theorem applied to each sequence  $\theta_n \rightarrow 0^+$  yields that

$$\begin{aligned} \lim_{\theta \downarrow 0} \frac{V(F + \theta(G - F)) - V(F)}{\theta} &= \int_{[0, M]} -w'(1 - F(x))(G(x) - F(x)) dv(x) \\ &\quad - \int_{[m, 0]} \tilde{w}'(F(x))(G(x) - F(x)) dv(x). \end{aligned}$$

Now define

$$\phi_F(x) = \begin{cases} w'(1 - F(x)) & x \in [0, M] \\ \tilde{w}'(F(x)) & x \in [m, 0] \end{cases} \quad (17)$$

and note that  $\phi_F$  is bounded and Borel measurable on  $[m, M]$  with

$$\lim_{\theta \downarrow 0} \frac{V(F + \theta(G - F)) - V(F)}{\theta} = - \int_{[m, M]} (G(x) - F(x)) \phi_F(x) dv(x).$$

Setting “ $du_F = \phi_F dv$ ”, or more precisely  $u_F(x) = \int_{[m, x]} \phi_F dv$  for all  $x \in [m, M]$ , it is not difficult to show that  $u_F \in C([m, M])$  and

$$\begin{aligned} \int_{[m, M]} (G(x) - F(x)) \phi_F(x) dv(x) &= \int_m^M (G - F) du_F \\ &= (G(M) - F(M)) u_F(M) - (G(m) - F(m)) u_F(m) - \left( \int_m^M u_F dG - \int_m^M u_F dF \right) \\ &= - \left( \int_{[m, M]} u_F dG - \int_{[m, M]} u_F dF \right) = - \int_{[m, M]} u_F d(G - F) \end{aligned}$$

where the second equality follows by integration by parts, the third by  $G(M) = F(M) = 1$  and  $u_F(m) = 0$ , and the last one by definition, proving the statement.  $\blacksquare$

**Lemma 3** *If  $w, \tilde{w} : [0, 1] \rightarrow [0, 1]$  are continuously differentiable,  $m < 0 < M$ , and all local utilities  $u_F$  of the preference functional (9 in the main text) are differentiable (resp., continuously differentiable) on  $(m, M)$ , then  $v$  is differentiable (resp., continuously differentiable) on  $(m, M)$ .*

*In this case,  $v'(0) \neq 0$ , implies  $\tilde{w}(p) = 1 - w(1 - p)$  for all  $p \in [0, 1]$ .*

Before entering the proof's details notice that if the preference  $\succsim$  represented by  $V$  is consistent with any risk order or any stochastic dominance of a degree  $n \geq 3$ , then all local utilities  $u_F$  are continuously differentiable. In fact, each  $u_F$  admits  $n-2$  continuous derivatives on  $(m, M)$  because its  $(n-2)$ -th derivative is either convex or concave and so it is continuous; clearly its derivatives of lower order are also continuous since they are differentiable.

**Proof.** Recall that, for each  $F \in \mathcal{D}$ ,

$$u_F(x) = \int_{[m, x]} [w'(1 - F(y)) 1_{[0, M]}(y) + \tilde{w}'(F(y)) 1_{[m, 0]}(y)] dv(y) \quad \forall x \in [m, M]$$

and, for all  $p \in [0, 1]$ , set  $F_p = pG_m + (1-p)G_M$ .

First we prove that for each  $p \in [0, 1]$ ,

$$w'(1-p) \frac{v(z) - v(x)}{z-x} = \frac{u_{F_p}(z) - u_{F_p}(x)}{z-x} \quad \forall x, z \in [0, M] \quad (18)$$

$$\tilde{w}'(p) \frac{v(z) - v(x)}{z-x} = \frac{u_{F_p}(z) - u_{F_p}(x)}{z-x} \quad \forall x, z \in (m, 0] \quad (19)$$

provided  $x \neq z$ . Since  $u_{F_p}$  is differentiable, for each  $p \in [0, 1]$ ,

$$w'(1-p) v'_+(x) = (u_{F_p})'_+(x) \quad \forall x \in [0, M] \quad (20)$$

$$w'(1-p) v'_-(x) = (u_{F_p})'_-(x) \quad \forall x \in (0, M) \quad (21)$$

$$\tilde{w}'(p) v'_-(x) = (u_{F_p})'_-(x) \quad \forall x \in (m, 0] \quad (22)$$

$$\tilde{w}'(p) v'_+(x) = (u_{F_p})'_+(x) \quad \forall x \in (m, 0) \quad (23)$$

and all left and right derivatives above are finite.

Distinguish the following cases

- for  $x \in [0, M]$ ,

$$u_F(x) = \int_{[m,0)} \tilde{w}'(F(y)) dv(y) + \int_{[0,x]} w'(1-F(y)) dv(y)$$

- in particular, for  $x = 0$ ,

$$u_F(0) = \int_{[m,0)} \tilde{w}'(F(y)) dv(y)$$

- for  $x \in [m, 0)$ ,

$$u_F(x) = \int_{[m,x]} \tilde{w}'(F(y)) dv(y)$$

and this also holds for  $x = 0$ .

For every  $x, z \in [0, M)$ , if  $z > x$ , then

$$u_F(z) - u_F(x) = \int_{(x,z]} w'(1-F(y)) dv(y)$$

and if  $x > z$ , then  $u_F(x) - u_F(z) = \int_{(z,x]} w'(1-F(y)) dv(y)$ , thus

$$u_F(z) - u_F(x) = \begin{cases} \int_{(x,z]} w'(1-F(y)) dv(y) & z > x \\ -\int_{(z,x]} w'(1-F(y)) dv(y) & z < x \end{cases}.$$

If  $F = F_p$ , then  $F_p = p$  on  $(m, M)$  and so

$$\frac{u_{F_p}(z) - u_{F_p}(x)}{z-x} = \begin{cases} w'(1-p) \frac{v(z)-v(x)}{z-x} & z > x \\ -w'(1-p) \frac{v(x)-v(z)}{z-x} & z < x \end{cases} = w'(1-p) \frac{v(z) - v(x)}{z-x} \quad \forall x, z \in [0, M),$$

proving (18).

Analogously, for every  $x, z \in (m, 0]$ , if  $z > x$ , then

$$u_F(z) - u_F(x) = \int_{(x,z]} \tilde{w}'(F(y)) dv(y)$$

and if  $x > z$ , then  $u_F(x) - u_F(z) = \int_{(z,x]} \tilde{w}'(F(y)) dv(y)$ , thus

$$u_F(z) - u_F(x) = \begin{cases} \int_{(x,z]} \tilde{w}'(F(y)) dv(y) & z > x \\ -\int_{(z,x]} \tilde{w}'(F(y)) dv(y) & z < x \end{cases}.$$

If  $F = F_p$ , then  $F_p = p$  on  $(m, M)$  and so

$$\frac{u_{F_p}(z) - u_{F_p}(x)}{z - x} = \begin{cases} \tilde{w}'(p) \frac{v(z) - v(x)}{z - x} & z > x \\ -\tilde{w}'(p) \frac{v(x) - v(z)}{z - x} & z < x \end{cases} = \tilde{w}'(p) \frac{v(z) - v(x)}{z - x} \quad \forall x, z \in (m, 0],$$

proving (19).

Equations (20), (21), (22), (23), and finiteness of all left and right derivatives follow easily (note that there exist  $p, q \in (0, 1)$  such that  $\tilde{w}'(p) \neq 0$  and  $w'(1 - q) \neq 0$ ).

The latter equations imply that: since  $u_{F_p}$  is differentiable (resp., continuously differentiable) on  $(m, M)$  for all  $p \in [0, 1]$ , then  $v$  is differentiable (resp., continuously differentiable) on  $(0, M)$  and  $(m, 0)$ .

But more is true, choosing  $x = 0$  in (20) and (22), it follows that

$$\tilde{w}'(p) v'_-(0) = (u_{F_p})'_-(0) = (u_{F_p})'_+(0) = w'(1 - p) v'_+(0) \quad \forall p \in [0, 1], \quad (24)$$

then by integrating both sides of (24) over  $[0, 1]$ ,

$$v'_-(0) = v'_-(0) \tilde{w}(1) = \int_0^1 \tilde{w}'(p) v'_-(0) dp = \int_0^1 w'(1 - p) v'_+(0) dp = v'_+(0)$$

so that  $v$  is differentiable also at 0. If  $u_F$  is continuously differentiable on  $(m, M)$  for all  $F \in \mathcal{D}$ , then choosing  $p$  such that  $\tilde{w}'(p) \neq 0$ , and taking  $x_n \rightarrow 0^-$  it follows that

$$\tilde{w}'(p) v'(x_n) = (u_{F_p})'(x_n) \rightarrow (u_{F_p})'(0) = \tilde{w}'(p) v'(0)$$

and so  $v'(x_n) \rightarrow v'(0)$ . Analogously, choosing  $q$  such that  $w'(1 - q) \neq 0$ , and taking  $y_n \rightarrow 0^+$  it follows that

$$w'(1 - q) v'(y_n) = (u_{F_q})'(y_n) \rightarrow (u_{F_q})'(0) = w'(1 - q) v'(0)$$

and so  $v'(y_n) \rightarrow v'(0)$ , so that  $v$  is continuously differentiable also at 0.

Finally, if  $v'(0) \neq 0$ , then (24) becomes

$$\tilde{w}'(p) = w'(1 - p) \quad \forall p \in [0, 1]$$

so that  $\tilde{w}(q) = \int_0^q \tilde{w}'(p) dp = \int_0^q w'(1 - p) dp = 1 - w(1 - q)$  for all  $q \in [0, 1]$ . ■

**Proof of Proposition 5.** As observed immediately after the statement of Lemma 3, consistency with the third degree risk order guarantees that all local utilities  $u_F$  are continuously differentiable (with convex derivative), hence the same lemma yields both continuous differentiability of  $v$  on  $(m, M)$  and the second part of the statement. ■

**Proof of Corollary 1.** (i) implies (ii). By Proposition 5 and as observed immediately after the statement of Lemma 3, note that if  $\succsim$  is consistent with third degree stochastic dominance, then  $v$  and all local derivatives are continuously differentiable on  $(m, M)$ . Moreover,  $\succsim$  is consistent with second degree stochastic dominance, and this implies that  $u_F$  is concave for all  $F \in \mathcal{D}$ . But then  $v'$  is decreasing on  $(m, 0]$ , by (22), and on  $[0, M)$ , by (20), thus it is decreasing on  $(m, M)$ , so that  $v$  is concave. Since it is strictly increasing, then  $v'(0) \neq 0$  and, by Lemma 3,  $\tilde{w}(p) = 1 - w(1 - p)$  for all  $p \in [0, 1]$ .

Arbitrarily choose  $p < q$  in  $(0, 1)$  and  $x < t$  in  $(m, 0)$ . For each  $F \in \mathcal{D}$ ,

$$\begin{aligned} u_F(z) - u_F(x) &= \int_{(x, z]} \tilde{w}'(F(y)) dv(y) & \forall z \in (x, 0) \\ u_F(z) - u_F(t) &= \int_{(t, z]} \tilde{w}'(F(y)) dv(y) & \forall z \in (t, 0) \end{aligned}$$

hence choosing  $H_{pq} \in \mathcal{D}$  such that  $H_{pq} = p$  in a neighborhood  $U_x$  of  $x$  and  $H_{pq} = q$  in a neighborhood  $U_t$  of  $t$ , then

$$\begin{aligned}\frac{u_{H_{pq}}(z) - u_{H_{pq}}(x)}{z - x} &= \tilde{w}'(p) \frac{v(z) - v(x)}{z - x} & \forall z \in U_x, z > x \\ \frac{u_{H_{pq}}(z) - u_{H_{pq}}(t)}{z - t} &= \tilde{w}'(q) \frac{v(z) - v(t)}{z - t} & \forall z \in U_t, z > t\end{aligned}$$

so that

$$v'(x) \tilde{w}'(p) = u'_{H_{pq}}(x) \geq u'_{H_{pq}}(t) = v'(t) \tilde{w}'(q)$$

for all  $0 < p < q < 1$  and all  $m < x < t < 0$ . But then letting  $t \rightarrow x$ , by continuity of  $v'$ , we obtain  $v'(x) \tilde{w}'(p) \geq v'(x) \tilde{w}'(q)$  and  $v'(x) > 0$  yields  $\tilde{w}'(p) \geq \tilde{w}'(q)$ , in turn, this implies that  $\tilde{w}$  is concave. As a consequence,  $w(p) = 1 - \tilde{w}(1 - p)$  is convex.

Now consider  $G_0$  and observe that for every  $x, z \in [0, M)$ , with  $z > x$ ,

$$u_{G_0}(z) - u_{G_0}(x) = \int_{(x,z]} w'(1 - G_0(y)) dv(y) = w'(0) (v(z) - v(x))$$

and so

$$u'_{G_0}(x) = w'(0) v'(x).$$

Analogously, for every  $t, z \in (m, 0]$ , with  $z < t$ , then

$$u_{G_0}(z) - u_{G_0}(t) = - \int_{(z,t]} \tilde{w}'(G_0(y)) dv(y) = - \int_{(z,t]} \tilde{w}'(0) dv(y)$$

because  $v$  is continuous at 0 and  $\tilde{w}'(G_0(y)) = \tilde{w}'(0)$  on  $(m, 0)$ , thus

$$u'_{G_0}(t) = \tilde{w}'(0) v'(t).$$

For  $x = t = 0$ , we have  $w'(0) v'(0) = \tilde{w}'(0) v'(0)$  and

$$w'(0) = \tilde{w}'(0)$$

but  $\tilde{w}'(p) = w'(1 - p)$  for all  $p \in (0, 1)$  and by continuity  $\tilde{w}'(0) = w'(1)$ , that is,  $w'(0) = w'(1)$  and  $w'$  being increasing must be constant on  $[0, 1]$ . Therefore  $w(p) = p = \tilde{w}(p)$  for all  $p \in [m, M]$ .

Finally, this implies

$$V(F) = \int_{[m,M]} v(y) dF(y) \quad \forall F \in \mathcal{D}$$

and consistency with third degree stochastic dominance also implies that  $v'$  is convex.

(ii) implies (i). It is a well known fact. ■

**Derivation of Equation (15).** Define  $W : \mathcal{D} \times \mathcal{D} \rightarrow \mathbb{R}$  by

$$W(F, G) = \int_{[m,M]} \int_{[m,M]} \phi(x, y) dF(x) dG(y) \quad \forall (F, G) \in \mathcal{D} \times \mathcal{D}.$$

It is immediate to check that  $W$  is affine in both components,  $W(F, G) = W(G, F)$  for all  $(F, G) \in \mathcal{D} \times \mathcal{D}$ , and  $V(F) = W(F, F)$  for all  $F \in \mathcal{D}$ . We start by observing two facts:

(a) Fix  $F, H \in \mathcal{D}$ . If we define  $F_\gamma = \gamma F + (1 - \gamma) H$  for all  $\gamma \in (0, 1]$ , then

$$\begin{aligned}V(F_\gamma) &= W(F_\gamma, F_\gamma) = \gamma W(F, F_\gamma) + (1 - \gamma) W(H, F_\gamma) \\ &= \gamma^2 W(F, F) + \gamma(1 - \gamma) W(F, H) + (1 - \gamma)\gamma W(H, F) + (1 - \gamma)^2 W(H, H) \\ &= \gamma^2 W(F, F) + 2(1 - \gamma)\gamma W(F, H) + (1 - \gamma)^2 W(H, H).\end{aligned}$$

(b) Fix  $F, G \in \mathcal{D}$ . If  $\int_{[m, M]} \phi(x, y) dF(x) \geq \int_{[m, M]} \phi(x, y) dG(x)$  for all  $y \in [m, M]$ , then for each  $H \in \mathcal{D}$

$$W(F, H) = \int_{[m, M]} \int_{[m, M]} \phi(x, y) dF(x) dH(y) \geq \int_{[m, M]} \int_{[m, M]} \phi(x, y) dG(x) dH(y) = W(G, H).$$

In particular, since  $H$  was arbitrarily chosen, we have that

$$V(F) = W(F, F) \geq W(G, F) = W(F, G) \geq W(G, G) = V(G).$$

Next, by facts (a) and (b), observe that

$$\begin{aligned} F \succ^* G &\iff \lambda F + (1 - \lambda)H \succ \lambda G + (1 - \lambda)H \quad \forall \lambda \in (0, 1], \forall H \in \mathcal{D} \\ &\iff V(\lambda F + (1 - \lambda)H) - V(\lambda G + (1 - \lambda)H) \geq 0 \quad \forall \lambda \in (0, 1], \forall H \in \mathcal{D} \\ &\iff \lambda^2(V(F) - V(G)) + 2\lambda(1 - \lambda)(W(F, H) - W(G, H)) \geq 0 \quad \forall \lambda \in (0, 1], \forall H \in \mathcal{D} \\ &\iff \lambda(V(F) - V(G)) + 2(1 - \lambda)(W(F, H) - W(G, H)) \geq 0 \quad \forall \lambda \in (0, 1], \forall H \in \mathcal{D} \\ &\iff V(F) \geq V(G) \text{ and } W(F, H) - W(G, H) \geq 0 \quad \forall H \in \mathcal{D} \\ &\iff V(F) \geq V(G) \text{ and } \int_{[m, M]} \phi(x, y) dF(x) \geq \int_{[m, M]} \phi(x, y) dG(x) \quad \forall y \in [m, M] \\ &\iff \int_{[m, M]} \phi(x, y) dF(x) \geq \int_{[m, M]} \phi(x, y) dG(x) \quad \forall y \in [m, M], \end{aligned}$$

proving the statement. ■

**Proof of Proposition 6.** Before starting, note that since  $v$  is strictly increasing and continuously differentiable, we have that there exists  $\bar{y} \in (m, M)$  such that  $v'(\bar{y}) > 0$  and  $v'(x) \geq 0$  for all  $x \in [m, M]$ . Wlog, we can assume that  $v(\bar{y}) = 0$ . By contradiction, assume that  $\succ$  is prudent. By point (v) of Lemma 1 and (15 in the main text), this means that the set  $\mathcal{U}^* = \{\phi(\cdot, y)\}_{y \in [m, M]}$  is included in  $\langle \mathcal{R}_3 \rangle = \{u \in C([m, M]) : u' \text{ exists and is convex on } (m, M)\}$ . Among all the elements of  $\mathcal{U}^*$ , consider  $\phi(\cdot, \bar{y}) : I \rightarrow \mathbb{R}$ . By Masatlioglu and Raymond (2014), note that

$$\begin{aligned} \phi(x, \bar{y}) &= \frac{v(x) + v(\bar{y}) + \mu(v(x) - v(\bar{y})) + \mu(v(\bar{y}) - v(x))}{2} \\ &= \frac{1}{2}(v(x) + \mu(v(x)) + \mu(-v(x))) \quad \forall x \in I. \end{aligned}$$

Since  $\phi(\cdot, \bar{y})$  is differentiable on  $(m, M) \ni \bar{y}$ , observe also that

$$\phi'_\pm(\bar{y}, \bar{y}) = \frac{1}{2}(v'(\bar{y}) + \mu_\pm(0)v'(\bar{y}) - \mu_\mp(0)v'(\bar{y}))$$

and  $\phi'_+(\bar{y}, \bar{y}) = \phi'_-(\bar{y}, \bar{y})$ . Since  $v'(\bar{y}) > 0$ , this implies that

$$v'(\bar{y}) + \mu_+(0)v'(\bar{y}) - \mu_-(0)v'(\bar{y}) = v'(\bar{y}) + \mu_-(0)v'(\bar{y}) - \mu_+(0)v'(\bar{y}),$$

that is,  $\mu_+(0) = \mu_-(0)$ , a contradiction with  $\mu'_-(0) > \mu'_+(0)$ . ■

**Proof of Proposition 7.** Consider  $F, G \in \mathcal{D}$ . Define  $f : [0, 1] \rightarrow \mathbb{R}$  by  $f(t) = V((1 - t)F + tG)$  for all  $t \in [0, 1]$ . By routine arguments, it can be shown that  $f$  is continuous on  $[0, 1]$ . As for differentiability of  $f$  on  $(0, 1)$ , we follow Huber and Ronchetti (2009, pages 39-40). Note that  $F_{t+h} = \left(1 - \frac{h}{1-t}\right)F_t + \frac{h}{1-t}G$  hence for each  $t \in (0, 1)$

$$\begin{aligned} f'_+(t) &= \lim_{h \downarrow 0} \frac{V(F_{t+h}) - V(F_t)}{h} = \lim_{h \downarrow 0} \frac{V\left(\left(1 - \frac{h}{1-t}\right)F_t + \frac{h}{1-t}G\right) - V(F_t)}{h} \\ &= \lim_{h \downarrow 0} \frac{1}{1-t} \frac{V\left(\left(1 - \frac{h}{1-t}\right)F_t + \frac{h}{1-t}G\right) - V(F_t)}{\frac{h}{1-t}} = \frac{1}{1-t} \int_I u_{F_t} d(G - F_t) = \int_I u_{F_t} d(G - F) \end{aligned}$$

(note that as  $h$  goes to  $0^+$  eventually  $F_{t+h} \in \mathcal{D}$ ) analogously  $F_{t-h} = (1 - \frac{h}{t}) F_t + \frac{h}{t} F$  and

$$\begin{aligned} f'_-(t) &= \lim_{h \downarrow 0} \frac{V(F_{t-h}) - V(F_t)}{-h} = \lim_{h \downarrow 0} \frac{V((1 - \frac{h}{t}) F_t + \frac{h}{t} F) - V(F_t)}{-h} \\ &= \lim_{h \downarrow 0} -\frac{1}{t} \frac{V((1 - \frac{h}{t}) F_t + \frac{h}{t} F) - V(F_t)}{\frac{h}{t}} = -\frac{1}{t} \int_I u_{F_t} d(F - F_t) = \int_I u_{F_t} d(G - F) \end{aligned}$$

that is,  $f'(t) = \int u_{F_t} dG - \int u_{F_t} dF$ . By the Mean Value Theorem for functions of a real variable, it follows that there exists  $t \in (0, 1)$  such that

$$\int_I u_{F_t} dG - \int_I u_{F_t} dF = f'(t) = \frac{f(1) - f(0)}{1 - 0} = f(1) - f(0) = V(G) - V(F),$$

proving the statement. ■

## References

- [1] P. J. Huber and E. M. Ronchetti, *Robust statistics*, 2<sup>nd</sup> ed., Wiley, New York, 2009.
- [2] Y. Masatlioglu and C. Raymond, A behavioral analysis of stochastic reference dependence, mimeo, 2014.
